# Supplementary material for: An Oxford Nanopore Technology-Based Hepatitis B Virus Sequencing Protocol Suitable For Genomic Surveillance Within Clinical Diagnostic Settings
Source: Preprints.org preprint supplement (doi:10.20944/preprints202410.0268.v2), 2024-10-08
Supplement: Supplementary file 1 [file supplementary]

**Table A1.** Verification of HBV recombinants using RDP5.56.

| **Sequence** | **RDP** | **GeneConv** | **BootScan** | **MaxChi** | **Chimaera** | **Sister scan** | **TOPAL** |
| --- | --- | --- | --- | --- | --- | --- | --- |
| K048723* | 1.08x10-15 | 5.51x10-10 | 4.61x10-02 | 7.31x10-09 | 1.15x10-07 | 1.58x10-04 | 6.45x10-13 |
| K048737* | 1.66x10-11 | 3.93x10-11 | NS | 6.41x10-07 | 2.02x10-05 | 1.79x10-08 | 8.29x10-11 |
| K048753* | 3.09x10-10 | 3.43x10-06 | NS | 5.64x10-06 | 4.17x10-05 | 1.26x10-09 | 8.07x10-09 |
| K048756* | 1.59x10-11 | 2.21x10-08 | 1.95x10-02 | 1.00x10-10 | 1.00x10-10 | 1.45x10-13 | 1.50x10-21 |
| K056892 | 2.30x10-07 | 1.76x10-05 | 7.24x10-05 | 2.94x10-04 | 2.01x10-04 | 8.16x10-06 | 9.75x10-07 |
| K056897 | 1.89x10-21 | 1.24x10-19 | 1.67x10-07 | 2.60x10-12 | 6.11x10-13 | 1.21x10-15 | 3.58x10-25 |
| K056900* | 1.47x10-16 | 8.36x10-13 | 2.77x10-13 | 4.40x10-11 | 4.37x10-10 | 1.64x10-13 | 3.32x10-15 |
| K056911 | 2.61x10-10 | 3.51x10-09 | 5.81x10-05 | NS | NS | 3.33x10-02 | 1.75x10-04 |
| K056916* | 2.16x10-10 | 1.92x10-08 | NS | 1.74x10-03 | 1.54x10-03 | 1.14x10-04 | 3.00x10-07 |
| K056934* | 7.56x10-16 | 1.39x10-05 | 1.06x10-04 | 3.93x10-03 | NS | NS | 1.74x10-04 |
| K056939 | 1.86x10-06 | 1.17x10-03 | 7.42x10-05 | 2.05x10-05 | 1.41x10-04 | 3.82x10-08 | 5.02x10-04 |
| K056944* | 4.52x10-18 | 3.36x10-15 | NS | 1.04x10-10 | 5.47x10-11 | 1.38x10-04 | 1.77x10-23 |
| K056945* | 3.42x10-20 | 1.26x10-17 | 1.83x10-02 | 1.88x10-18 | 1.48x10-05 | 2.92x10-26 | 2.53x10-27 |
| K056950* | 5.16x10-08 | 1.87x10-06 | NS | 7.51x10-06 | 2.34x10-06 | 8.20x10-03 | 4.75x10-09 |
| K057256* | 1.47x10-17 | 9.40x10-17 | 4.14x10-04 | 4.17x10-11 | 1.31x10-11 | 4.29x10-12 | 4.52x10-26 |
| K057265 | 7.53x10-11 | 1.72x10-09 | 1.03x10-03 | 4.03x10-08 | 9.05x10-05 | 1.10x10-02 | 1.10x10-10 |
| K057280* | 6.92x10-21 | 2.63x10-22 | 2.12x10-19 | 3.78x10-06 | 3.29x10-06 | 1.28x10-07 | 8.01x10-21 |

Recombinant IDs marked with a "*" were also classified as recombinants by jpHMM.
